# Supplementary material for: Diverticulitis Is Associated with Increased Risk of Colon Cancer—A Nationwide Register-Based Cohort Study
Source: MDPI journal article supplement (doi:10.3390/jcm13092503), 2024-04-24

## Supplementary material 1

**Table S1. Diagnostic codes used to identify the diverticulitis cohort, colon cancer events, and confounders.** NOMESCO = Nordic Medico-Statistical Committee

Classification of Surgical Procedures.<sup>54</sup> ICD-10 = International Classification of Diseases and Related Health Problems 10<sup>th</sup> Revision.<sup>55</sup> DNHSR = The Danish National Health Service Register.<sup>23</sup> DNPR = The Danish National Patient Register.<sup>19</sup>

| Classification system | Disease, operation, or procedure         | Codes                                                                                                                                                                                                                                                                                             | Source register |
|-----------------------|------------------------------------------|---------------------------------------------------------------------------------------------------------------------------------------------------------------------------------------------------------------------------------------------------------------------------------------------------|-----------------|
| ICD-10                | Diverticulitis:                          |                                                                                                                                                                                                                                                                                                   |                 |
|                       | - All diagnoses                          | K572, K572A-C, K573, K573A, K573B.                                                                                                                                                                                                                                                                | DNPR            |
|                       | - Uncomplicated diverticulitis diagnoses | K573, K573A-B.                                                                                                                                                                                                                                                                                    | DNPR            |
|                       | - Complicated diverticulitis diagnoses   | 1) K572, K572A-C.<br>or<br>2) K573, K573A-B.<br>and<br>additional<br>diagnosis for<br>abscess: K630,<br>K650A, K650C-J.<br>or<br>procedure code<br>(NOMESCO) for<br>abscess drainage or<br>peritoneal lavage:<br>KJAJ, KJAJ00,<br>KTJA40, KJAA00A,<br>KJAK00, KJAK01,<br>KJAK, KJAK03,<br>KJAK04. | DNPR            |

|             |                    |                                                                                                                               |                                          |
|-------------|--------------------|-------------------------------------------------------------------------------------------------------------------------------|------------------------------------------|
|             | Colon cancer       | C18 including all subcodes except C188A and C189X.                                                                            | The Danish Cancer Registry <sup>21</sup> |
|             | Crohn's disease    | K50, K501, K501D, K508, K508D, K508A, K509, M074, O996A.                                                                      | DNPR                                     |
|             | Ulcerative colitis | K51, K515, K519, K518, M092, O996B, M075.                                                                                     | DNPR                                     |
|             | Diabetes           | E10 including all subcodes, E11 including all subcodes, E13, E134, E136, E137, E138, E14 including all subcodes, N083, ALAL22 | DNPR                                     |
| NOME<br>SCO | Total colectomy    | KJFH, KJFH00-01, KJFH10-11, KJFH20-21, KJFH30-31, KJFH33, KJFH40, KJFH96.                                                     | DNPR                                     |
|             | Colon resection    | KJFB, KJFB20-21, KJFB30-31, KJFB33-34, KJFB40-41, KJFB43-44, KJFB46-47, KJFB50-51, KJFB60-61, KJFB63-64.                      | DNPR                                     |
|             | Colonoscopy        | KUJF32, KUJF35,<br>Fee number used in DNHSR: 2114                                                                             | DNPR and DNHSR                           |

## Supplementary material 2

**Table S2. Cancer classifications used in The Danish Cancer Registry (DCR) and overview of cancer stages.** \* Classification system used in DCR 1943–2003. + Classification system used in DCR 2004 and to date.<sup>21</sup> ‡ Colon cancer stages based on the cancer staging manual by American Joint Committee on Cancer.<sup>56</sup>

| Classification (years of use)              | Content of classification                                                                                                                                                                                                                                                                                            | Cancer stage ‡                                                                                                                                                                                                                                                                                                                                  |
|--------------------------------------------|----------------------------------------------------------------------------------------------------------------------------------------------------------------------------------------------------------------------------------------------------------------------------------------------------------------------|-------------------------------------------------------------------------------------------------------------------------------------------------------------------------------------------------------------------------------------------------------------------------------------------------------------------------------------------------|
| DUKE (1943–2003) *                         | <ul style="list-style-type: none"> <li>• DUKE A: Confined to the inner lining of the bowel</li> <li>• DUKE B: Tumor grown through muscle layer of the bowel</li> <li>• DUKE C: Spread to at least one lymph node in proximity to the cancer</li> <li>• DUKE D: Distant metastases</li> <li>• Not reported</li> </ul> | Stage 1: <ul style="list-style-type: none"> <li>• DUKE A</li> <li>• T1N0M0</li> <li>• T2N0M0</li> </ul> Stage 2: <ul style="list-style-type: none"> <li>• DUKE B</li> <li>• T3N0M0</li> <li>• T4N0M0</li> </ul> Stage 3: <ul style="list-style-type: none"> <li>• DUKE C</li> <li>• Regional</li> <li>• T1-4N1M0</li> <li>• T1-4N2M0</li> </ul> |
| Classification unique to DCR (1943–2003) * | <ul style="list-style-type: none"> <li>• Localized</li> <li>• Regional</li> <li>• Remote metastases</li> <li>• Not reported</li> </ul>                                                                                                                                                                               | Stage 4: <ul style="list-style-type: none"> <li>• DUKE D</li> <li>• Remote metastases</li> <li>• T1-4N0-3M1</li> </ul>                                                                                                                                                                                                                          |
| TNM classification (2004 to date) †        | Consists of three categories: T indicates the extent of invasion of the primary tumor, N indicates spread to nearby lymph nodes, M indicates distant metastases. <p style="text-align: center;">T:</p> <ul style="list-style-type: none"> <li>• T1</li> <li>• T2</li> <li>• T3</li> <li>• T4</li> </ul>              | Stage X: <ul style="list-style-type: none"> <li>• Localized</li> </ul>                                                                                                                                                                                                                                                                          |

|  |                                                                                                                                                                                                                                                                                                                                                                                                                                                                             |  |
|--|-----------------------------------------------------------------------------------------------------------------------------------------------------------------------------------------------------------------------------------------------------------------------------------------------------------------------------------------------------------------------------------------------------------------------------------------------------------------------------|--|
|  | <ul style="list-style-type: none"><li>· Tx: Information on size of primary tumor not available</li></ul> <p>N:</p> <ul style="list-style-type: none"><li>· N0</li><li>· N1</li><li>· N2</li><li>· N3</li><li>· Nx: Information on lymph node status not available</li></ul> <p>M:</p> <ul style="list-style-type: none"><li>· M0: No distant metastases</li><li>· M1: Distant metastases identified</li><li>· Mx: Information on distant metastases not available</li></ul> |  |
|--|-----------------------------------------------------------------------------------------------------------------------------------------------------------------------------------------------------------------------------------------------------------------------------------------------------------------------------------------------------------------------------------------------------------------------------------------------------------------------------|--|

### Supplementary material 3

**Figure S1. Kaplan Meier Curve showing the cumulative hazard of colon cancer incidence with time between the group with diverticulitis and the control group without diverticulitis.** The curve only shows data on the cohort with no censoring from inclusion date and to six months after. The disease-free survival time starts six months after the inclusion date.

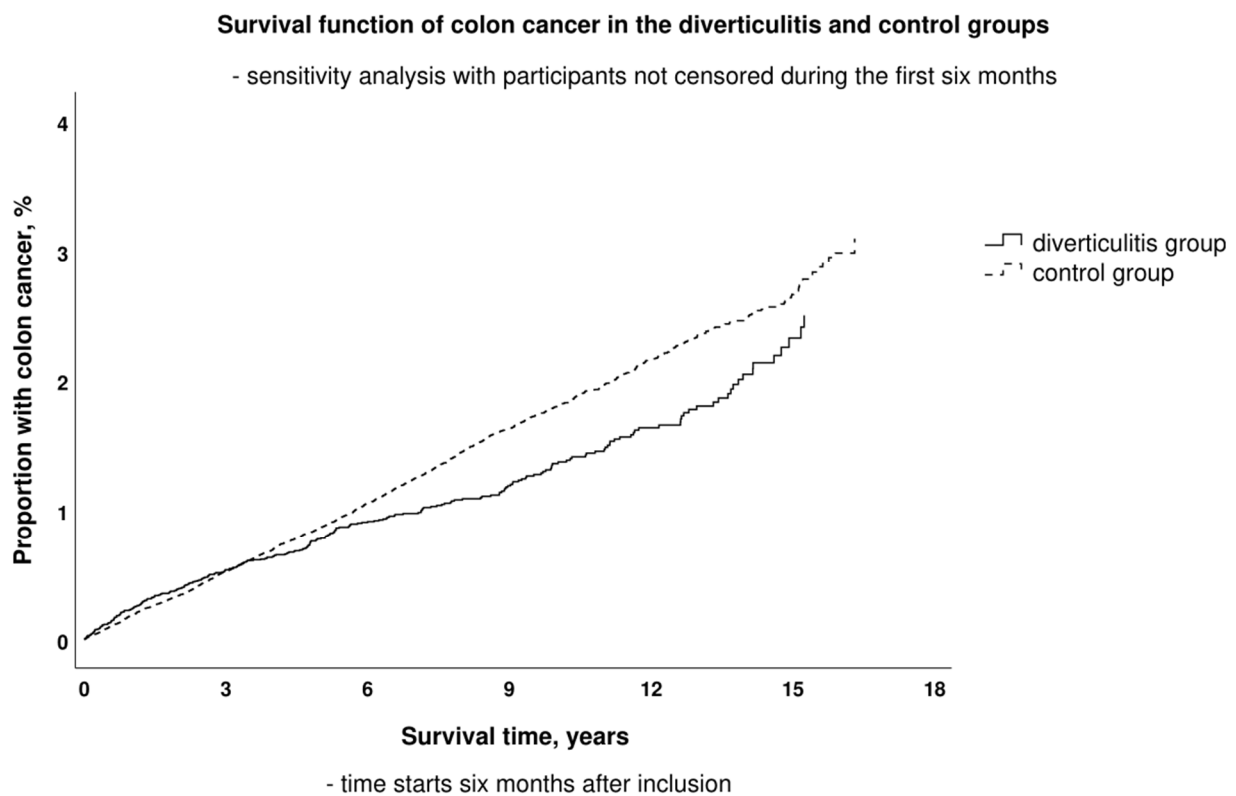

Supplement: s1 [file s1]
